# Supplementary material
Source: Royal Society of Chemistry journal article supplement (doi:10.1039/d5ay01405k)
Supplement: d5ay01405k3.pdf [file d5ay01405k3.pdf]

**Table** Comparison of general conditions between SA-NK group and SA-AKI group

|                                         | Group ( mean ± standard deviation ) |                    |                     | $t/\chi^2$ | <i>p</i> |
|-----------------------------------------|-------------------------------------|--------------------|---------------------|------------|----------|
|                                         | NC group(n = 20)                    | SA-NK group (n=21) | SA-AKI group (n=21) |            |          |
| Age                                     | 54.35±5.58                          | 80.33±11.71        | 73.29±15.42         | 1.668      | 0.103    |
| Gender( %)                              | 11(55.00%)                          | 13(61.90%)         | 15(71.42%)          | 1.491      | 0.474    |
| Nutritive mark                          | /                                   | 4.52±1.08          | 4.24±1.34           | 0.762      | 0.451    |
| SOFA mark                               | /                                   | 4.57±1.89          | 7.38±3.71           | -3.095     | 0.004**  |
| White blood cell (10 <sup>9</sup> /L)   | 5.95±1.32                           | 13.05±7.11         | 13.75±7.91          | -0.300     | 0.765    |
| Neutrophil percentage (NE%)             | 57.21±6.94                          | 82.92±15.99        | 81.32±26.73         | 0.237      | 0.814    |
| Neutrophil count (10 <sup>9</sup> /L)   | 3.45±1.07                           | 10.80±6.79         | 12.42±7.10          | -0.757     | 0.454    |
| Lymphocyte count (10 <sup>9</sup> /L)   | 2.02±0.45                           | 1.32±1.25          | 0.89±1.07           | 1.196      | 0.239    |
| Hemoglobin (g/L)                        | 143.35±9.60                         | 108.95±26.27       | 102.26±23.52        | 0.870      | 0.389    |
| Platelet (10 <sup>9</sup> /L)           | 229.90±50.35                        | 215.00±91.80       | 140.51±100.23       | 2.511      | 0.016*   |
| C reactive protein(CRP)(mg/L)           | /                                   | 11.00±6.20         | 32.00±6.20          | -10.967    | <0.001** |
| Albumin (g/L)                           | 46.04±1.88                          | 32.26±5.57         | 27.80±5.66          | 2.576      | 0.014*   |
| Globulin (g/dL)                         | 28.59±3.22                          | 30.07±5.76         | 25.25±5.83          | 2.600      | 0.013*   |
| Glutamic pyruvic transaminase(U/L)      | 25.45±19.57                         | 36.90±33.98        | 100.81±227.71       | -1.272     | 0.211    |
| Glutamic-oxalacetic transaminase(U/L)   | /                                   | 8.26±4.72          | 18.86±7.99          | -5.161     | <0.001** |
| Fasting blood glucose(mmol/L)           | 5.29±0.46                           | 9.68±5.37          | 10.98±7.08          | -0.627     | 0.535    |
| Creatinine(μmol/L)                      | 76.93±15.15                         | 64.40±26.01        | 252.36±133.67       | -6.325     | <0.001** |
| Urea nitrogen(mmol/L)                   | 5.41±1.41                           | 9.38±4.35          | 28.25±19.35         | -4.361     | <0.001** |
| Survival within 28 days ( mortality % ) | /                                   | 4(19.05%)          | 17(80.95%)          | 16.095     | <0.001** |

\* *p*<0.05 \*\* *p*<0.01
