# Supplementary material
Source: Royal Society of Chemistry journal article supplement (doi:10.1039/d5ay01405k)

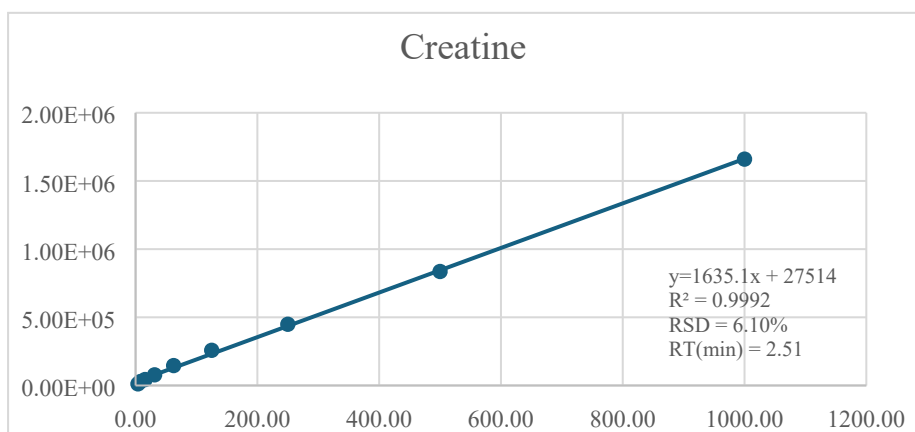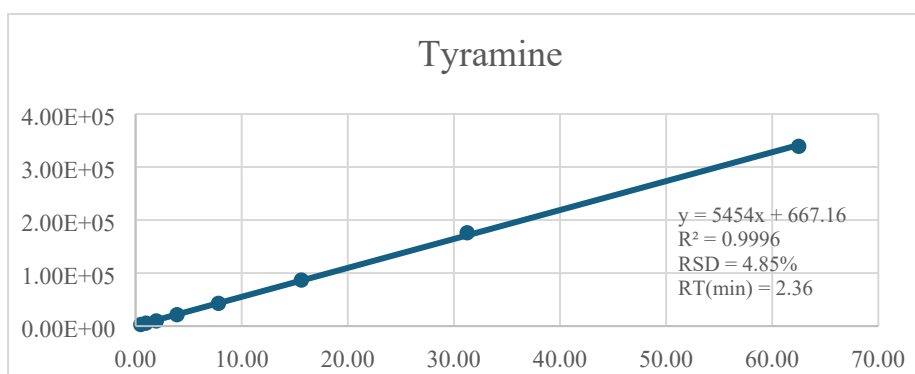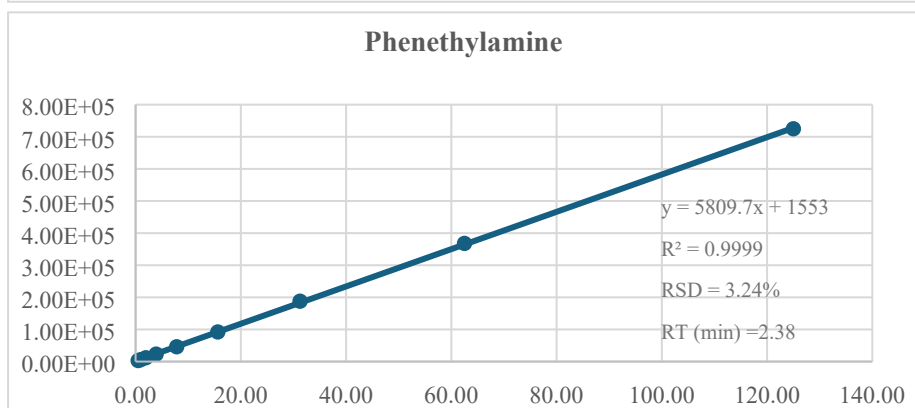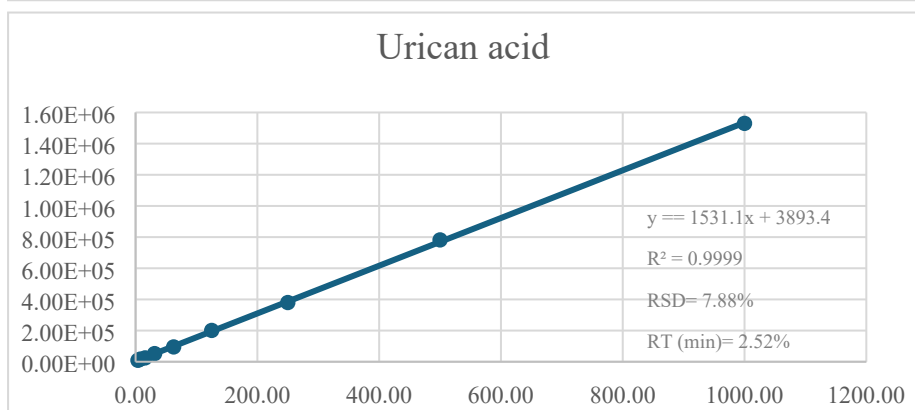

### Acetyl-L-carnitine

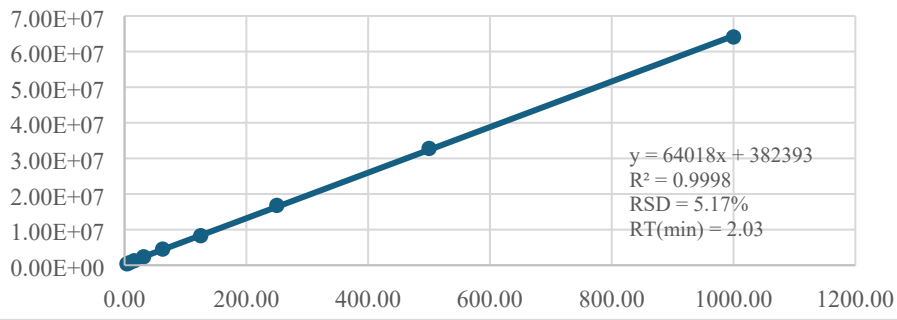

### Theophylline

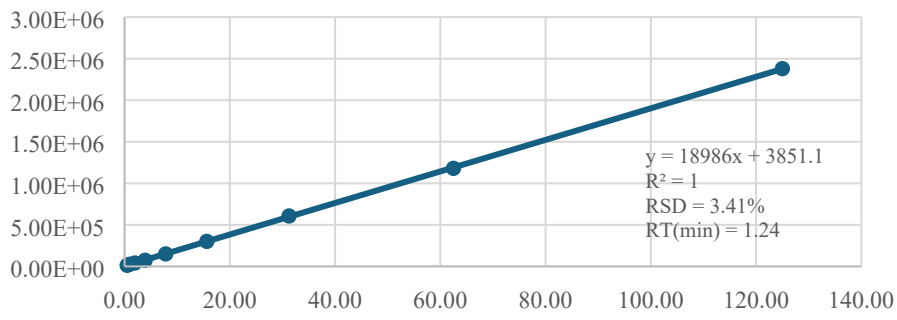

Supplement: d5ay01405k1.pdf [file d5ay01405k1.pdf]
